# Supplementary material for: A diketopiperazine factor from Rheinheimera aquimaris QSI02 exhibits anti-quorum sensing activity
Source: PubMed Central journal article supplement (PMC5175134; doi:10.1038/srep39637), 2016-12-21
Supplement: srep39637-s1.pdf [file srep39637-s1.pdf]

## Supplementary Information

### A diketopiperazine factor from *Rheinheimera aquimaris*

### QSI02 exhibits anti-quorum sensing activity

Shiwei Sun, Xiaoyun Dai, Jiao Sun, Xiangguo Bu, Caihong Weng, Hui Li and Hu Zhu\*

**Supplementary Figure 1:** The  $^1\text{H-NMR}$  spectrum of compound cyclo(Trp-Ser) in  $\text{CDCl}_3$ .

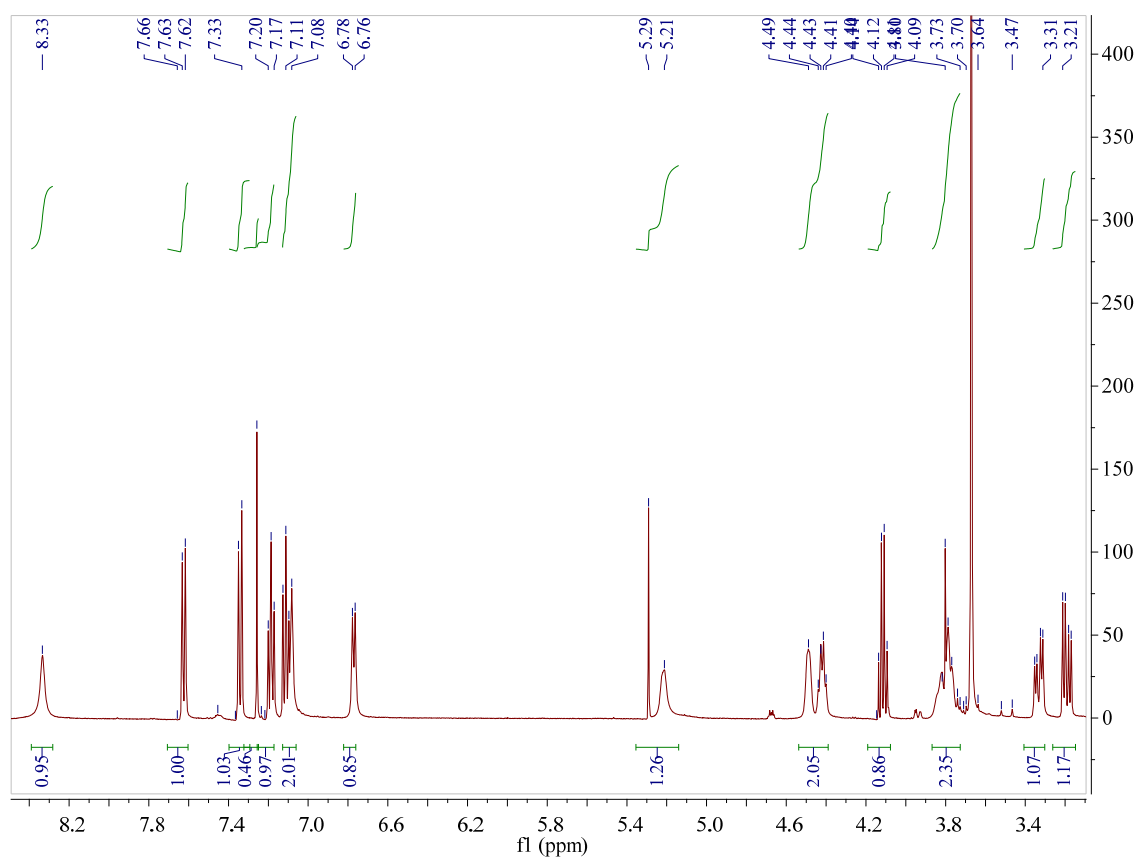

**Supplementary Figure 2:** The  $^{13}\text{C}$ -NMR spectrum of compound cyclo(Trp-Ser) in  $\text{CDCl}_3$ .

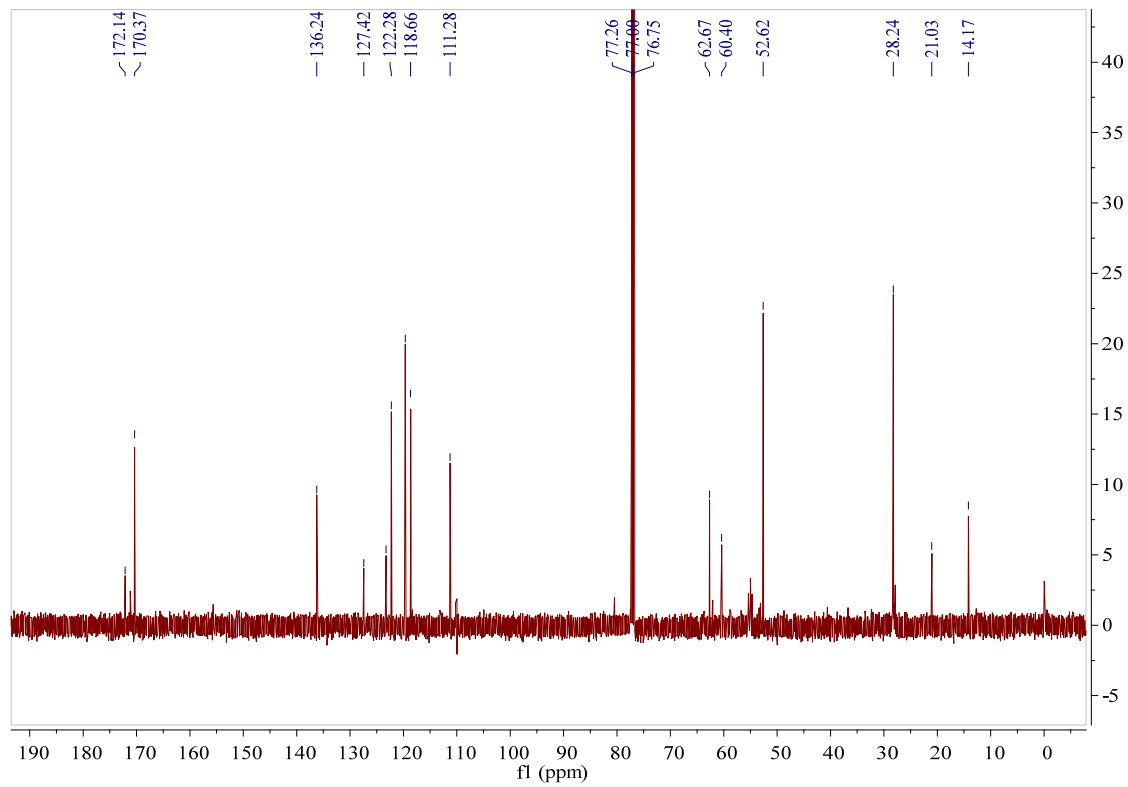

**Supplementary Figure 3:** The MS spectrum of compound cyclo(Trp-Ser).

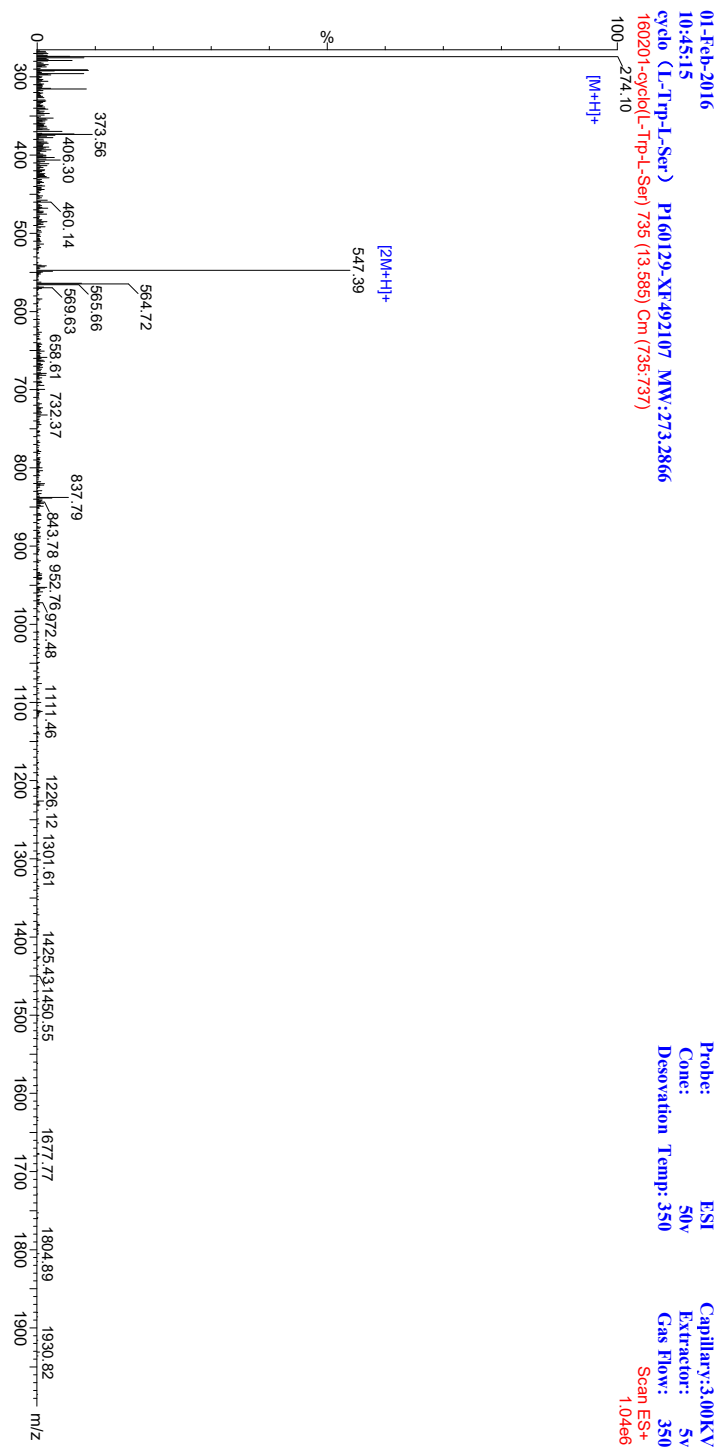

**Supplementary Figure 4:** (A) Overlay of docked pose of C<sub>6</sub>HSL (native ligand; in green sticks) with its X-ray structure (in yellow sticks) for 3QP1 protein. (B) Analysis of docked C<sub>6</sub>HSL bound to 3QP1 showing the key interactions in the binding pocket.

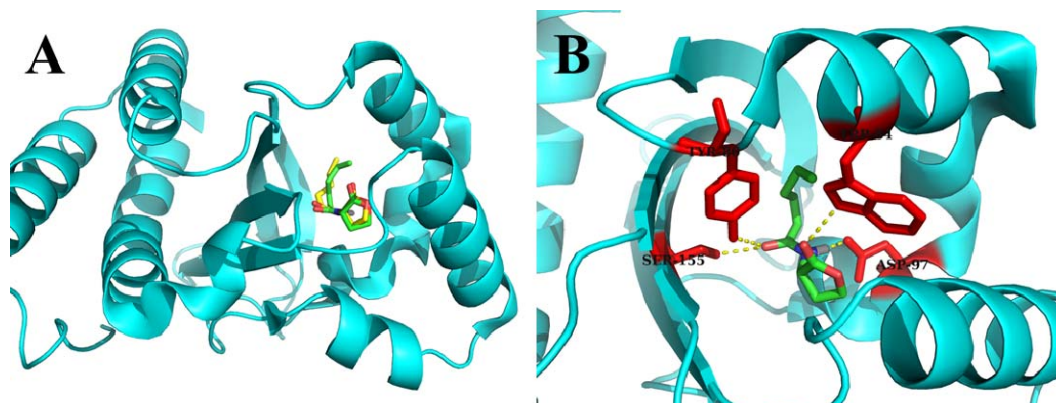

**Supplementary Figure 5:** (A) Overlay of docked pose of 3-oxo-C<sub>12</sub>HSL (native ligand; in green sticks) with its X-ray structure (in yellow sticks) for 2UV0 protein, with RMSD=1.56 Å. (B) analysis of docked 3-oxo-C<sub>12</sub>HSL bound to 2UV0 showing the key interactions in the binding pocket.

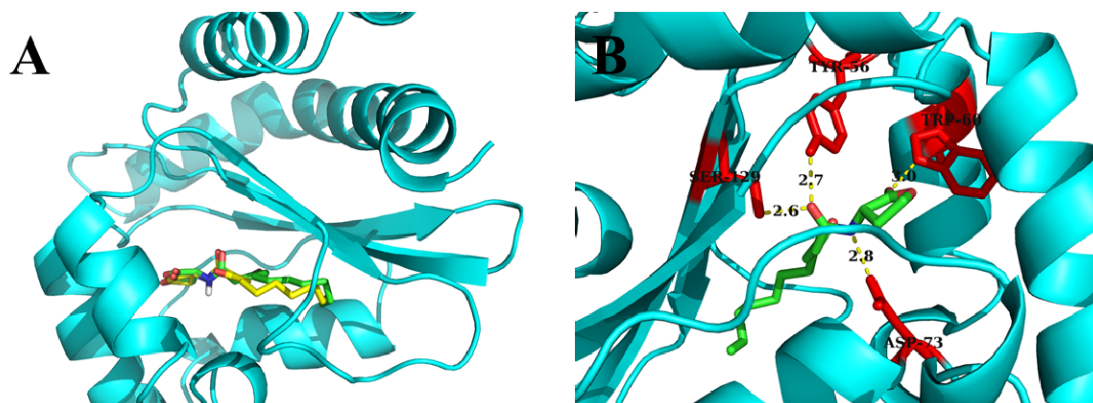

**Supplementary Table 1** MICs values of cyclo(Trp-Ser) and azithromycin against different microorganisms.

| Microorganisms                         | MIC(mg/ml)     |              |
|----------------------------------------|----------------|--------------|
|                                        | cyclo(Trp-Ser) | azithromycin |
| <i>Staphylococcus aureus</i> ATCC25923 | 3.2            | 0.2          |
| <i>Escherichia coli</i>                | 6.4            | 0.2          |
| <i>Chromobacterium violaceum</i>       | 3.2            | 0.4          |
| <i>Chromobacterium violaceum</i> CV026 | 3.2            | 0.4          |
| <i>Pseudomonas aeruginosa</i> PA01     | 6.4            | 0.2          |
| <i>Candida albicans</i> 00147          | 6.4            | 0.8          |
